# Supplementary material for: Ex vivo anticoagulants affect human blood platelet biomechanics with implications for high-throughput functional mechanophenotyping
Source: PubMed Central journal article supplement (PMC8782918; doi:10.1038/s42003-021-02982-6), 2022-01-21
Supplement: 42003_2021_2982_MOESM2_ESM.pdf [file 42003_2021_2982_MOESM2_ESM.pdf]

## Supplementary Information

### ***Ex vivo* anticoagulants affect human blood platelet biomechanics with implications for high-throughput functional mechanophenotyping.**

Laura Sachs<sup>1</sup>, Jan Wesche<sup>1</sup>, Lea Lenkeit<sup>1</sup>, Andreas Greinacher<sup>1</sup>, Markus Bender<sup>2</sup>, Oliver Otto<sup>3,4\*</sup>, Raghavendra Palankar<sup>1\*</sup>

<sup>1</sup> Institute for Immunology and Transfusion Medicine, University Medicine Greifswald, Fleischmannstr.8, 17475 Greifswald, Germany

<sup>2</sup> Institute of Experimental Biomedicine - Chair I, University Hospital and Rudolf Virchow Center, Würzburg, Germany.

<sup>3</sup> Zentrum für Innovationskompetenz – Humorale Immunreaktionen bei Kardiovaskulären Erkrankungen, Universität Greifswald, Fleischmannstr. 42, 17489 Greifswald, Germany

<sup>4</sup> Deutsches Zentrum für Herz-Kreislauf-Forschung e.V., Standort Greifswald, Universitätsmedizin Greifswald, Fleischmannstr. 42, 17489 Greifswald, Germany.

\*corresponding authors

oliver.otto@uni-greifswald.de

raghavendra.palankar@med.uni-greifswald.de

**Contents:**

**Supplementary Fig. 1. Schematics of RT-FDC setup.**

**Supplementary Fig. 2: Calculation of Area Ratio  $\Delta$  in Shapeout software.**

**Supplementary Fig. 3: Application of range area ratio and cell size filter to raw data acquired in RT-FDC by using in ShapeOut software.**

**Supplementary Fig. 4: Distribution of single platelet deformation in individual donors.**

**Supplementary Fig. 5: Distribution of single platelet size in individual donors.**

**Supplementary Fig. 6: Event images of platelet morphologies in the RT-FDC measurement channel.**

**Supplementary Fig. 7: Flow cytometric detection of platelet CD62P expression and F-actin content.**

**Supplementary Fig. 8: Edge-to-edge line profile fluorescence intensities of F-actin distribution and microtubule ring organization.**

**Supplementary Fig. 9: Influence of LatB on CD62P surface expression and PAC-1 binding on platelets in *ex vivo* anticoagulants.**

**Supplementary Fig. 10: Event images with the contour of platelet morphologies from the RT-FDC measurement channel from healthy individual and MYH9 p.E1841K patient in ACD-A.**

**Supplementary Fig. 11: Event images with the contour of platelet morphologies from the RT-FDC measurement channel from healthy individual and MYH9 p.E1841K patient in ACD-A. in K<sub>2</sub>-EDTA.**

**Supplementary Fig.12: Platelet deformation and CD62P expression from a patient with MYH9 p.E1841K.**

**Supplementary Fig. 13: Platelet deformation and platelet activation measured for binding of the anti-PAC-1 antibody as a function of exposure of conformational epitope of the integrin  $\alpha$ IIb $\beta$ 3 from a patient with MYH9 p.E1841K.**

**Supplementary Fig.14: Flow cytometric detection of platelet CD62P expression and F-actin content in MYH9 p.E1841K patient.**

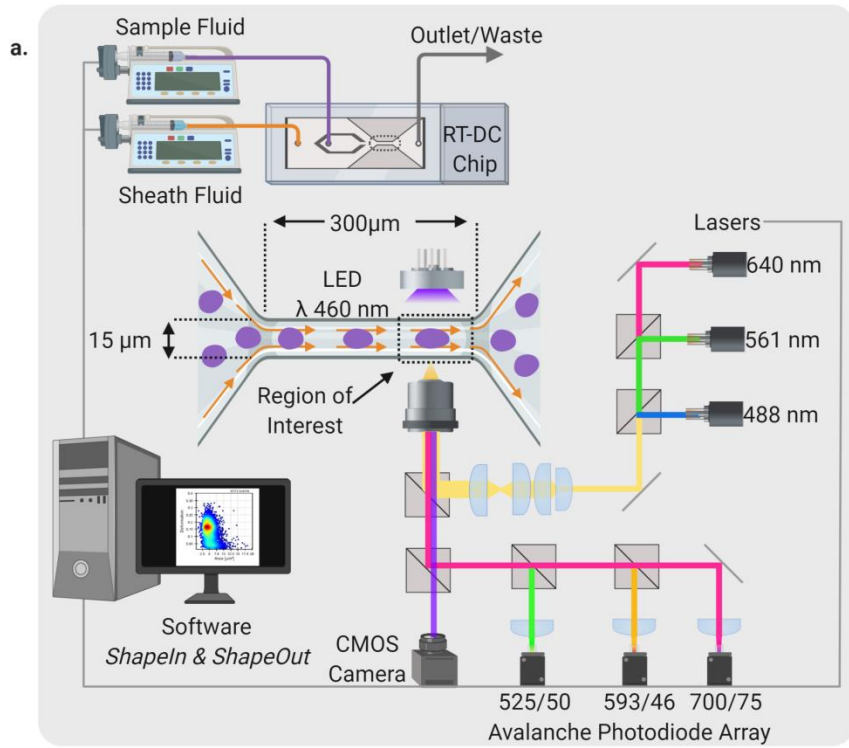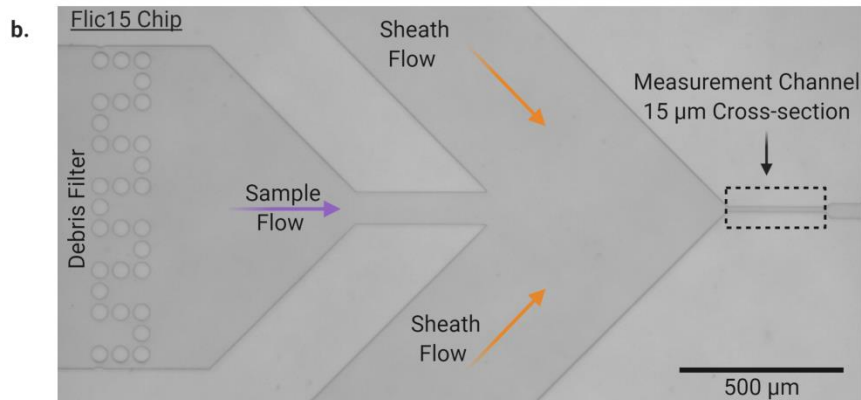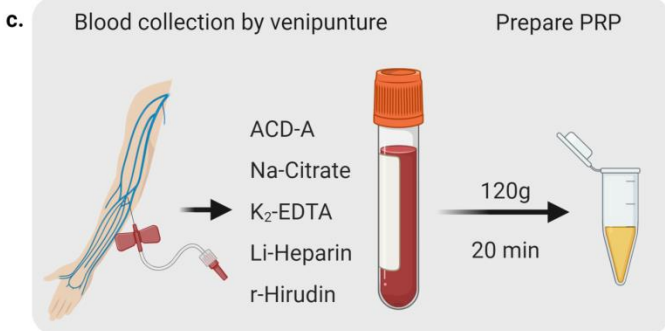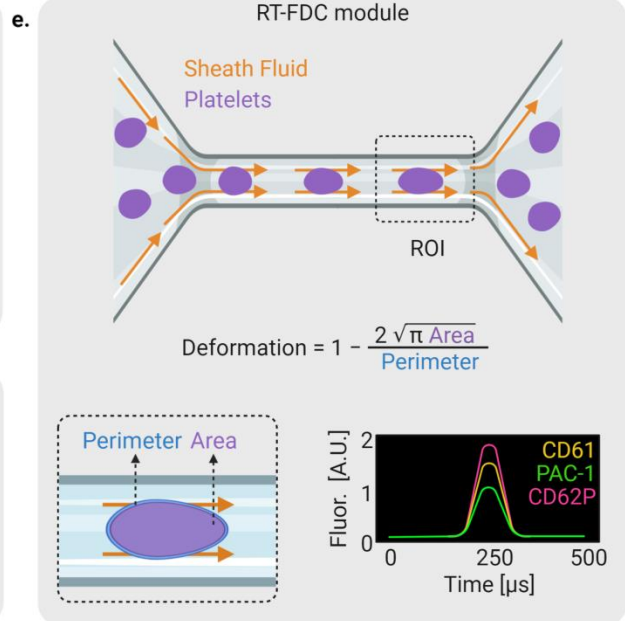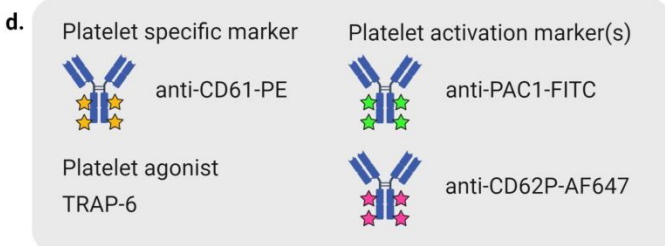

**Supplementary Fig. 1: a.** Schematic depiction of real-time fluorescence and deformability (RT-FDC) instrumentation configuration and **b.** overview of the Flic15 microfluidic chip used for mechanophenotyping of human platelets showing the arrangement of micro-channels for the dedicated flow of sample and sheath fluids that merge into the measurement channel with a cross-section of 15  $\mu\text{m}$  and a length of 300  $\mu\text{m}$ . Graphical description of the experimental outline for functional mechanophenotyping of single platelets by RT-FDC. **c.** Sample Preparation: Whole blood is collected by venipuncture into *ex vivo* anticoagulants: ACD-A, sodium citrate, K<sub>2</sub>EDTA, Li-Heparin, and r-Hirudin. Freshly prepared platelet-rich plasma (PRP) from whole blood by centrifugation is mixed with **d.** antibodies and with/without agonists. Platelet suspension is pumped through a microfluidic channel and imaged by CMOS camera, while three lasers excite and avalanche photodiodes measure fluorescence. In the narrow constriction zone, cell deformation occurs due to the hydrodynamic pressure gradient created by the surrounding fluid deformation is determined by on-the-fly image processing. Figures 1a, c, d and e created with [BioRender.com](https://www.biorender.com).

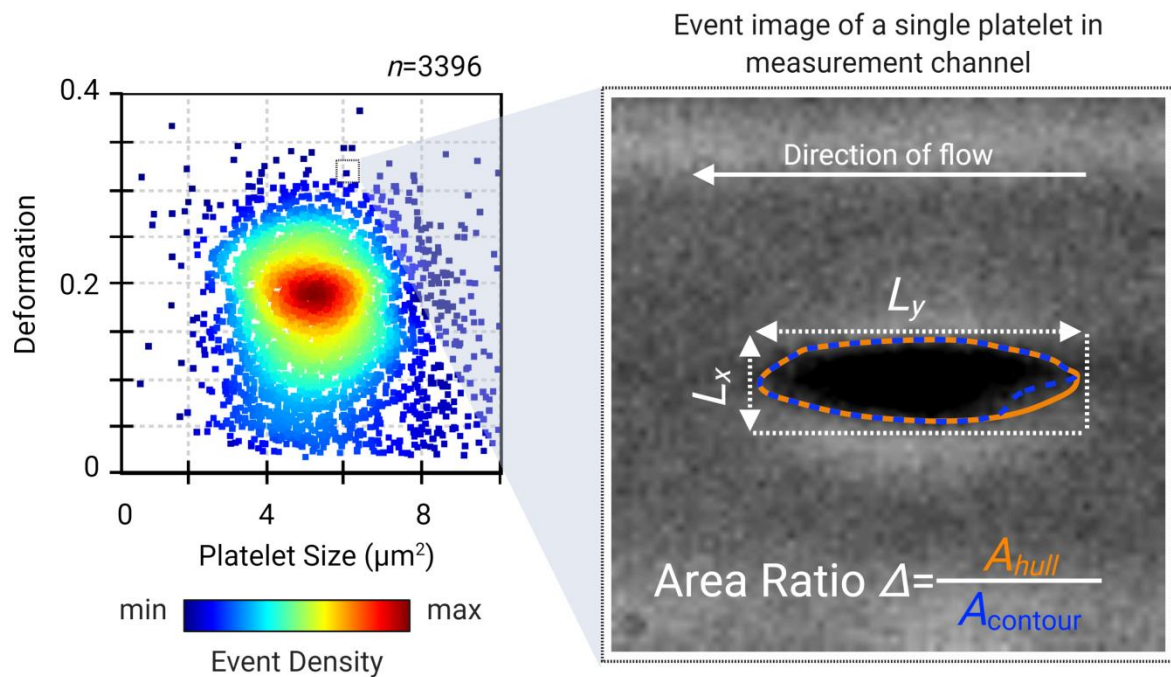

**Supplementary Fig. 2: Calculation of Area Ratio  $\Delta$  in Shapeout software.** Example RT-FDC scatter plot of platelet deformation against size from non-stimulated platelets, colored by Kernel Density Estimate (KDE), showing a single platelet's bright-field event image during passage through microfluidic measurement channel of  $15\mu\text{m}$  in cross-section. The bounding box defines the lengths  $L_x$  and  $L_y$ , and the area of the contour ( $A_{\text{contour}}$ ) and convex hull ( $A_{\text{hull}}$ ) are used to calculate the platelet size and circularity, respectively. The ratio between  $A_{\text{hull}}$  and  $A_{\text{contour}}$  gives the area ratio ( $\Delta$ ), used for applying the filter to select only platelets for further analysis.

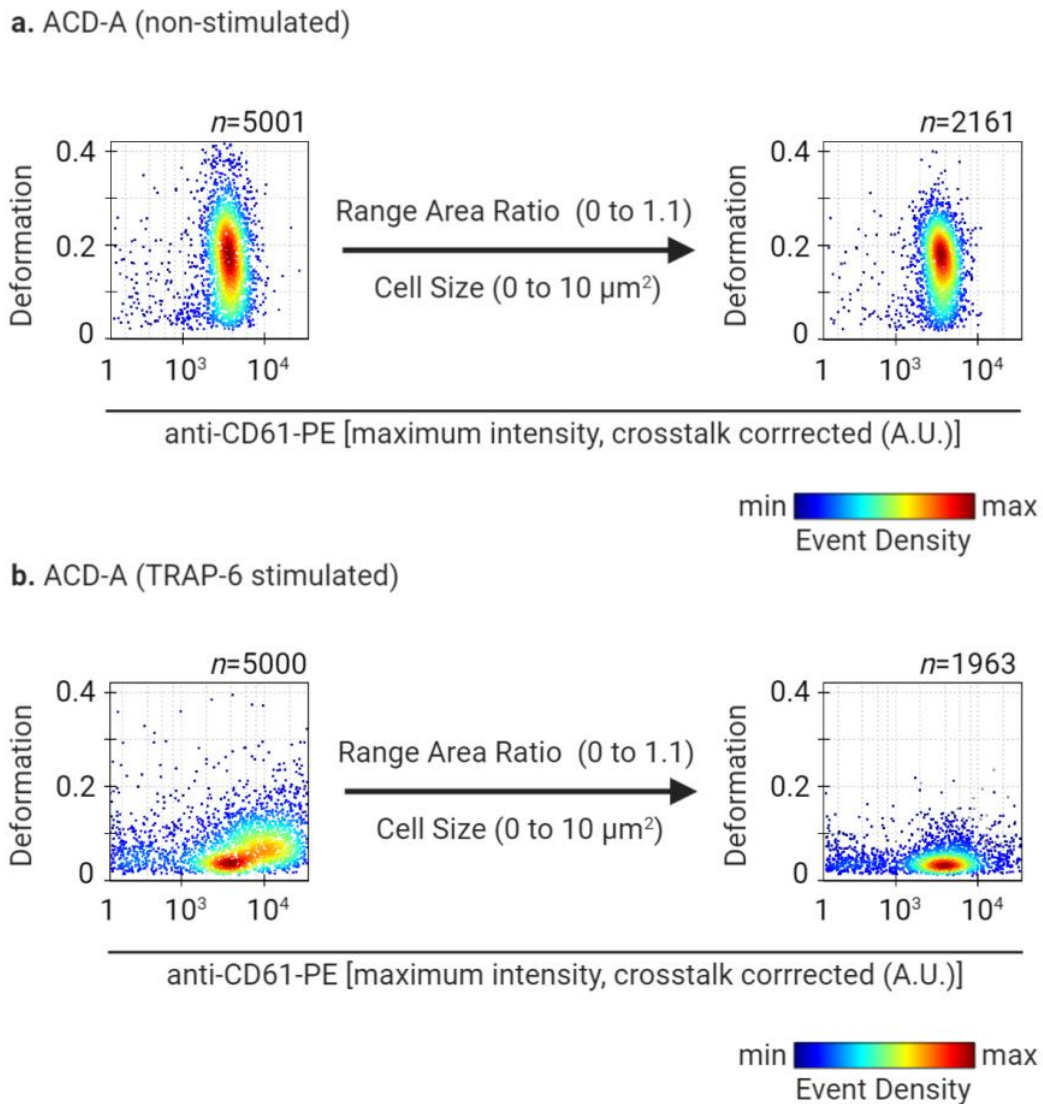

**Supplementary Fig. 3: Application of range area ratio and cell size filter to raw data acquired in RT-FDC by using in ShapeOut software.** Scatter Plot colored by Kernel Density Estimate (KDE) of RT-FDC data plotted for platelet deformation (along Y-axis) and for fluorescence intensity of platelets specifically labeled for CD61 surface with mouse monoclonal anti-human CD61-PE marker (along X-axis, maximum fluorescence intensity, crosstalk corrected (A.U.)) before and after applying filters for range area ratio and cell size in ShapeOut software in non-stimulated (a) and TRAP-6 stimulated platelets (b).

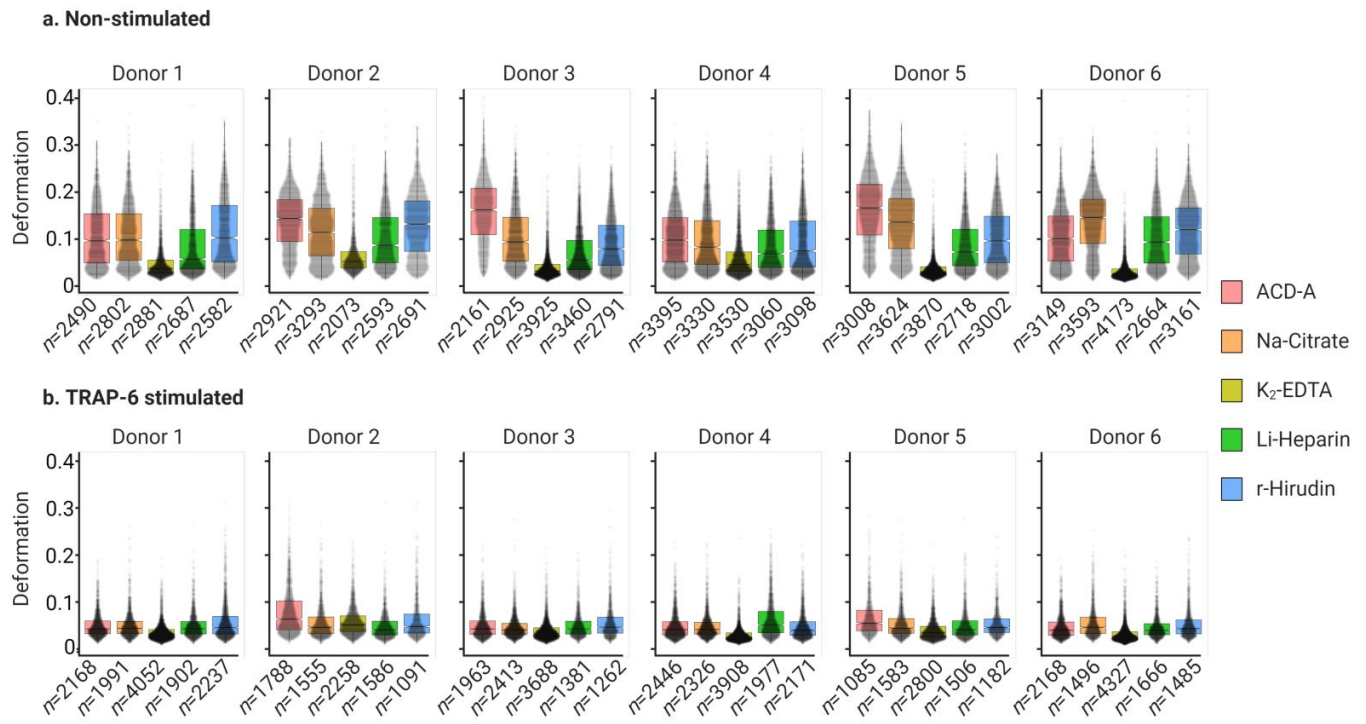

**Supplementary Fig. 4: Distribution of single platelet deformation in individual donors.** Violin plots of platelet deformation from six healthy donors before and after stimulation with PAR-1 agonist TRAP-6 peptide (20 $\mu$ M) for 10 minutes in the presence of PRP obtained from blood collected in different anticoagulants. n= number of single platelets analyzed for each per donor for each *ex vivo* anticoagulant.

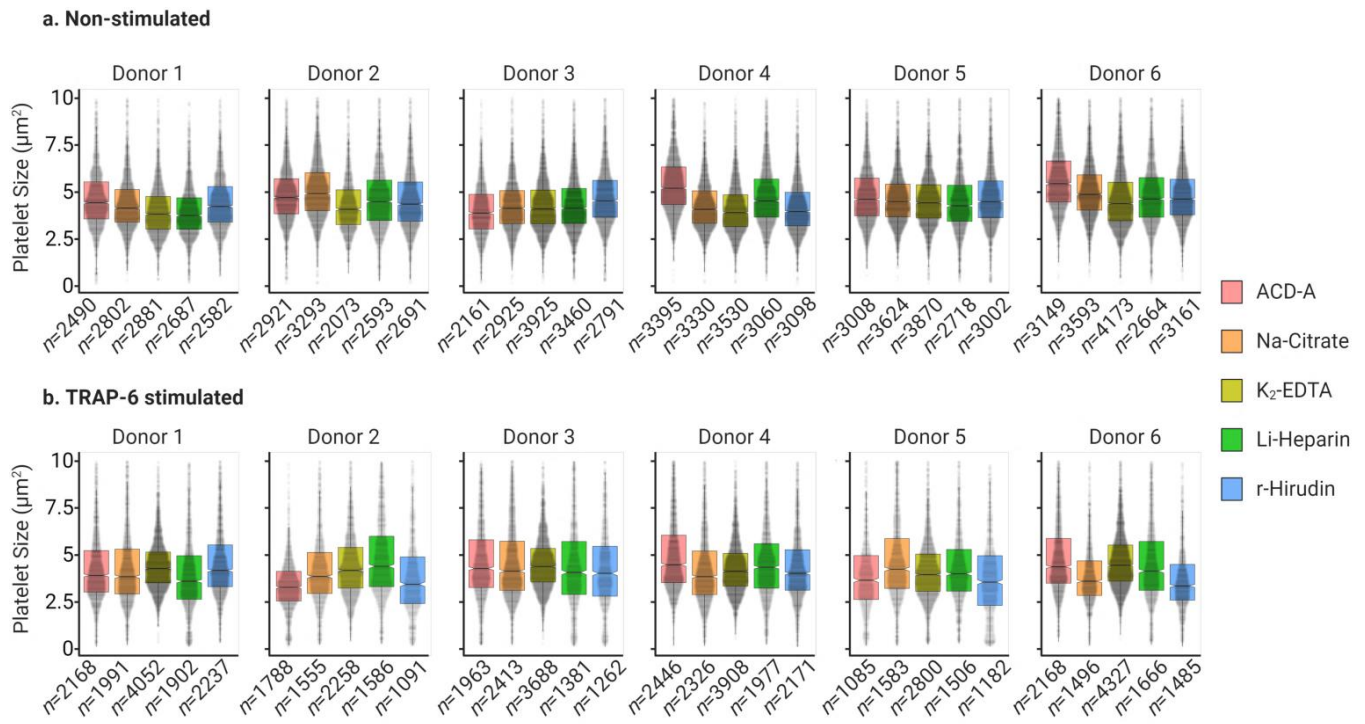

**Supplementary Fig. 5: Distribution of single platelet size in individual donors.** Violin plots overlaid with box plots of platelet size ( $\mu\text{m}^2$ ) from six healthy donors before and after stimulation with PAR-1 agonist TRAP-6 peptide ( $20\mu\text{M}$ ) for 10 minutes in the presence of PRP obtained from blood collected in different anticoagulants. n= number of single platelets analyzed for each per donor for each *ex vivo* anticoagulant.



**a. ACD-A**

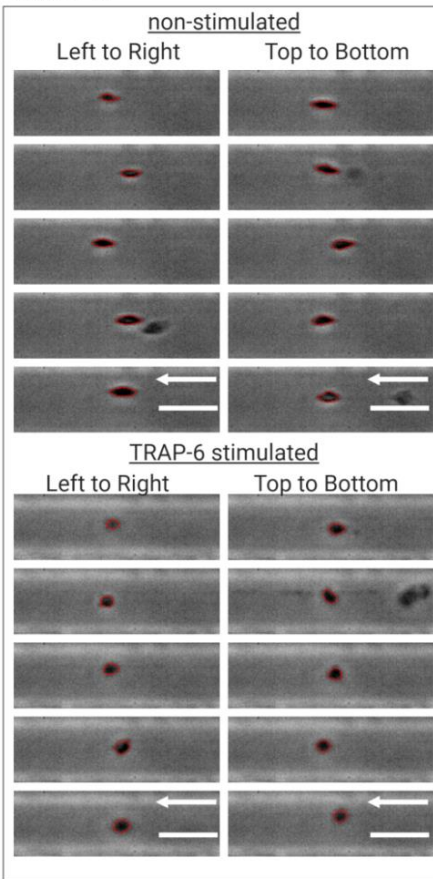

**b. Na-Citrate**

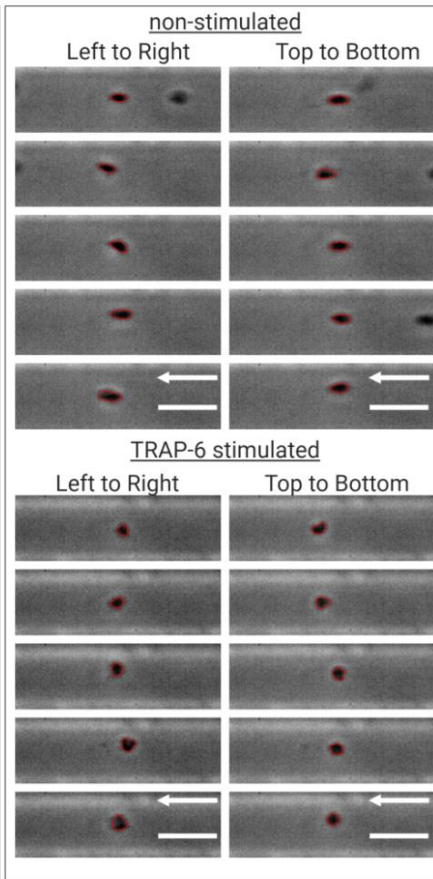

**c. K<sub>2</sub>-EDTA**

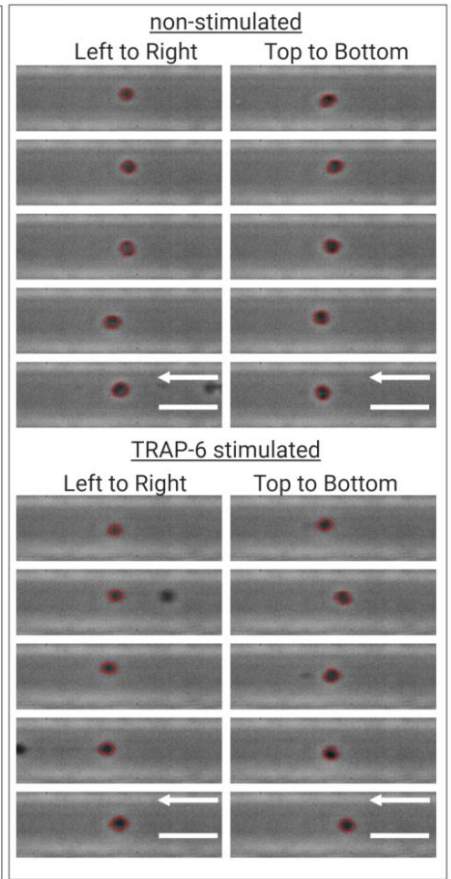

**d. Li-Heparin**

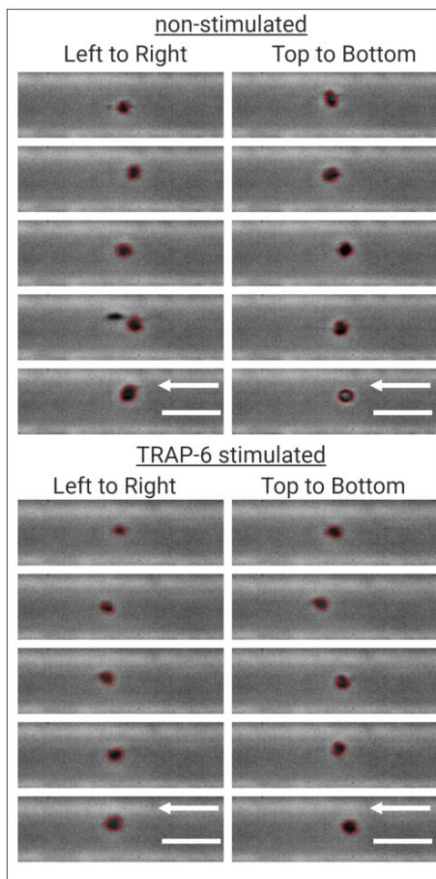

**e. r-Hirudin**

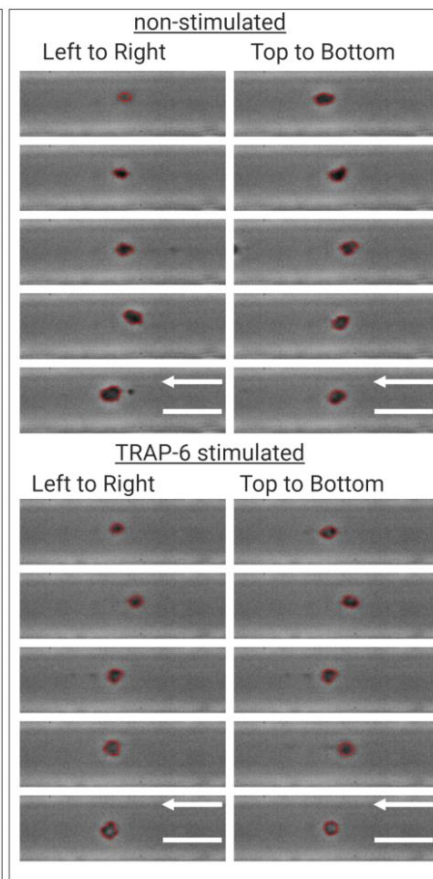

**Supplementary Fig. 6: Event images of platelet morphologies in the RT-FDC measurement channel.**

Representative bright-field images of human platelets in different *ex vivo* anticoagulants **a.** ACD-A, **b.** Na-Citrate, **c.** K2-EDTA, **d.** Li-Heparin and **e.** r-Hirudin under non-stimulated (resting condition) and in the presence of platelet PAR-1 agonist TRAP-6. These event images were selected from RT-FDC scatter plots (main text Figure 2-from left to right and top to bottom- 5 images each) of corresponding experimental conditions overlaid with the contour (red outline) in ShapeOut analysis software. Arrow indicates the direction of flow, and the scale bar corresponds to 10 $\mu$ m.

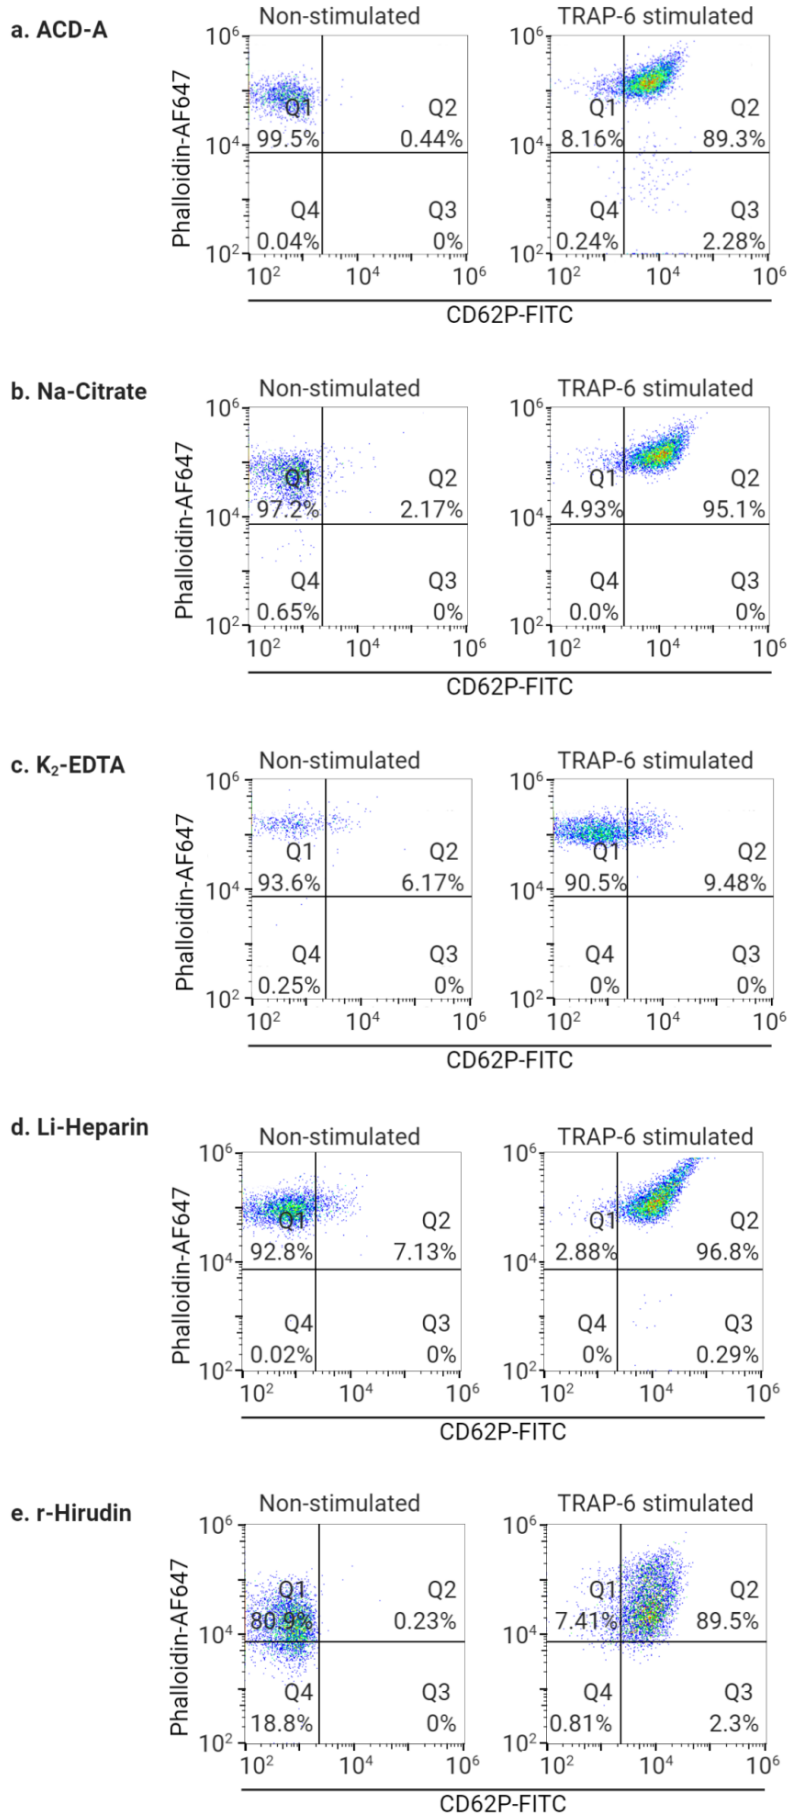

**Supplementary Fig. 7: Flow cytometric detection of platelet CD62P expression and F-actin content.**

Representative flow cytometry bivariate density dot plots of non-stimulated and TRAP-6 stimulated platelets in PRP. Platelets are labeled for platelet specific activation marker CD62P (with anti-CD62P-FITC) and F-actin (with Phalloidin-AF647) in different *ex vivo* anticoagulants **a.** ACD-A, **b.** Na-Citrate, **c.** K2-EDTA, **d.** Li-Heparin and **e.** r-Hirudin. The quadrant regions show the percentage of platelets in each sub-population.

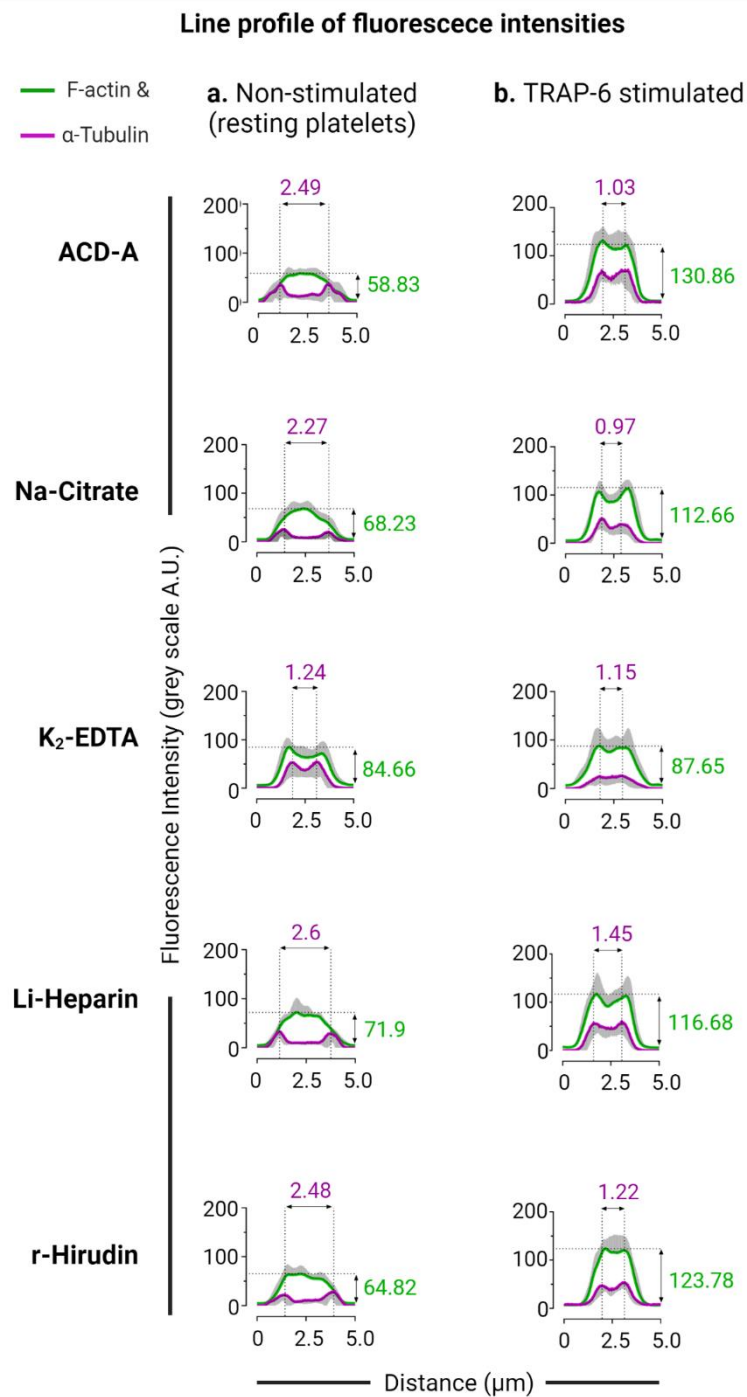

**Supplementary Fig. 8:** Fluorescence intensity line profiles across individual platelets depicted in (Fig. 4a and Fig. 4d) showing fluorescence intensity (A.U.) (along Y-axis for F-actin in green), and immunofluorescence detection of circumferential marginal band  $\alpha$ -tubulin ring (magenta) shown as a measure of the change in the edge-to-edge length ( $\mu\text{m}$ ) (plotted along X-axis in magenta). Graphical plots show mean  $\pm$  S.D. from fluorescence intensity (A.U.) of  $n \leq 10$  single platelets *per ex vivo* anticoagulant.

### CD62P surface expression

○ DMSO (vehicle control)  
 ▼ LatB 0.5 µg/ml  
 n=3 donors

#### a. Non-stimulated

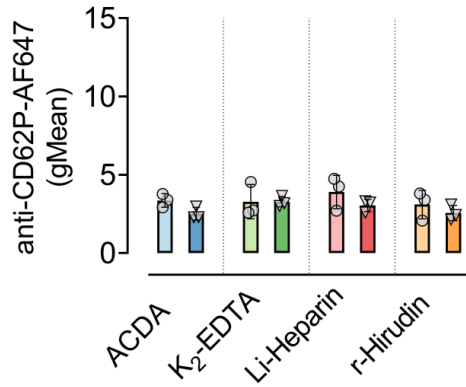

#### b. TRAP-6 stimulated

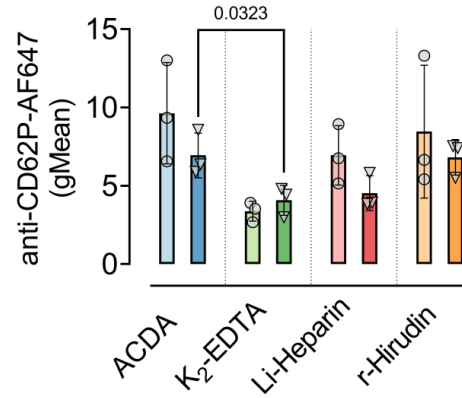

### PAC-1 binding

○ DMSO (vehicle control)  
 ▼ LatB 0.5 µg/ml  
 n=3 donors

#### c. Non-stimulated

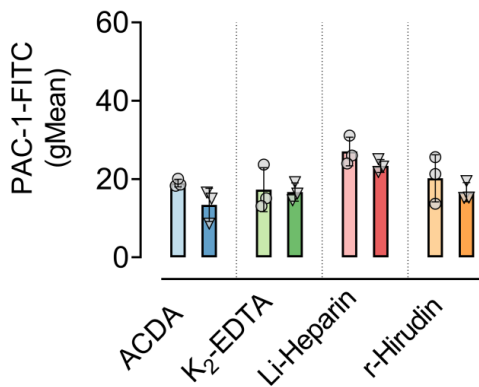

#### d. TRAP-6 stimulated

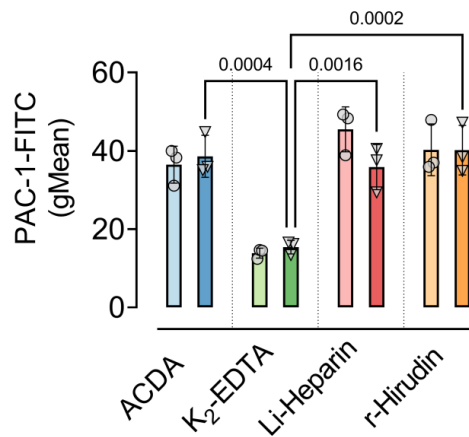

**Supplementary Fig. 9: Influence of LatB on CD62P surface expression and PAC-1 binding on platelets in *ex vivo* anticoagulants.** Summary graphs show of median values of individual donors, while bar graphs show mean ± S.D. of geometric mean fluorescence intensity (gMean) of CD62P expressing platelets (a, b) or PAC-1-FITC antibody bound to platelets (c, d) in non-stimulated and TRAP-6 stimulated platelets. The cut-off was set for 5000 events or 10 minutes for unstimulated or TRAP-6-stimulated platelets, respectively (n= 3 donors).

ACD-A as *ex vivo* anticoagulant

a. \_\_\_\_\_ non-stimulated

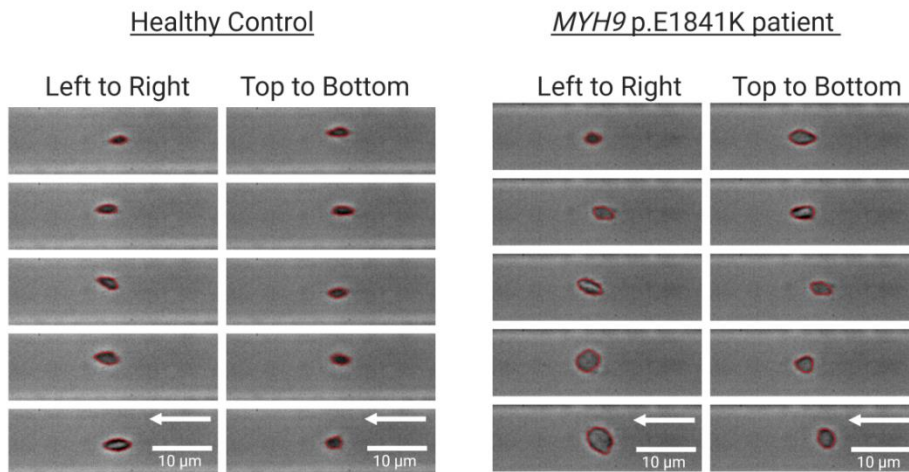

b. \_\_\_\_\_ TRAP-6 stimulated

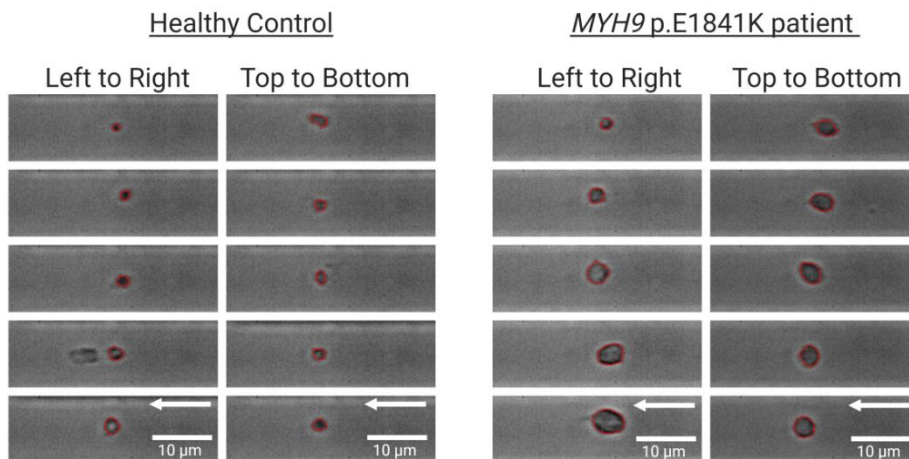

**Supplementary Fig. 10: Event images with the contour of platelet morphologies from the RT-FDC measurement channel from healthy individual and MYH9 p.E1841K patient in ACD-A.** Comparison of representative bright-field images of platelets in PRP prepared from ACD-A anticoagulated blood from a healthy individual and from a patient with MYH9 p.E1841K mutation under **a.** non-stimulated (resting condition) and **b.** in the presence of platelet PAR-1 agonist TRAP-6. These event images were selected from RT-FDC scatter plots (main text Figure 7-from left to right and top to bottom- 5 images each) of corresponding experimental conditions overlaid with the contour (red outline) in ShapeOut analysis software. Arrow indicates the direction of flow and the scale bar corresponds to 10μm.

**K<sub>2</sub>-EDTA as *ex vivo* anticoagulant**

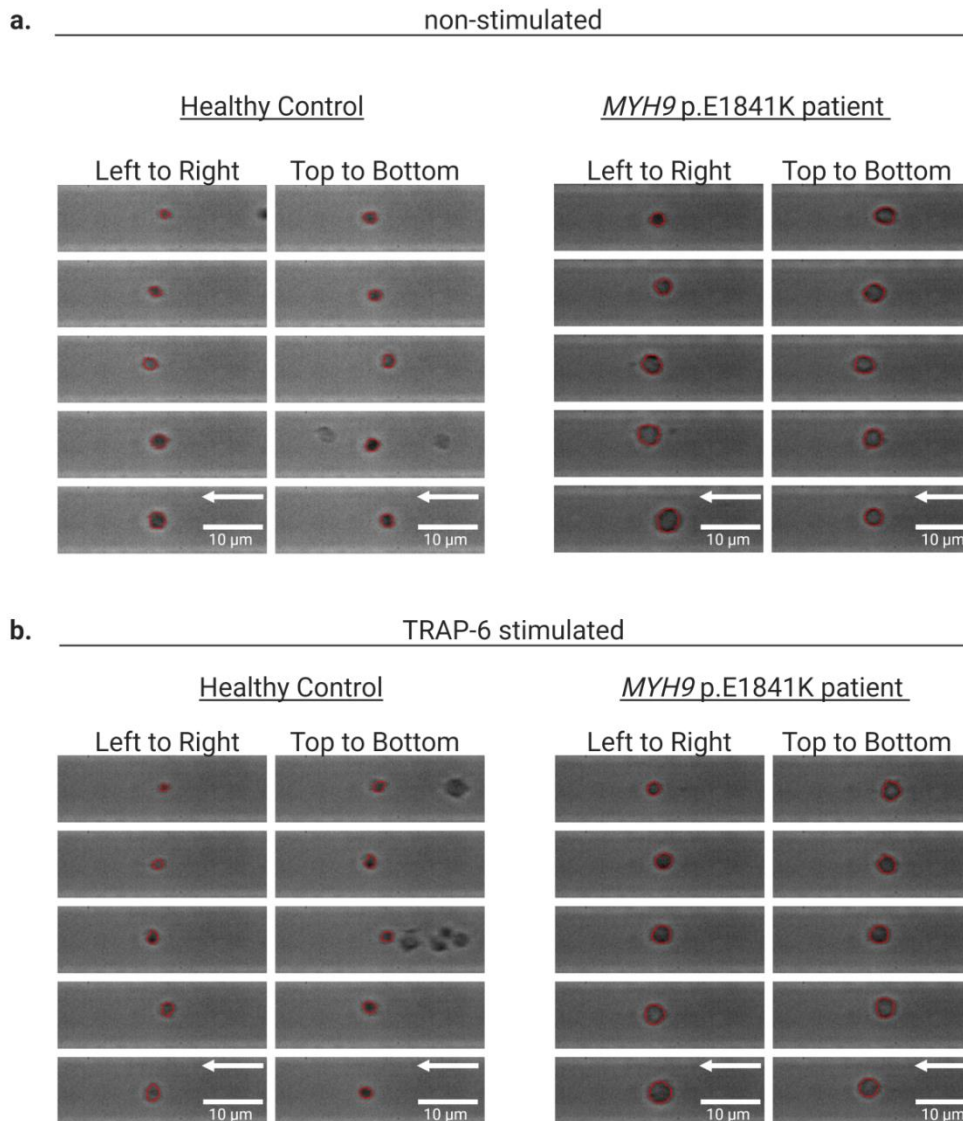

**Supplementary Fig. 11: Event images with the contour of platelet morphologies from the RT-FDC measurement channel from a healthy individual and MYH9 p.E1841K patient in ACD-A. in K<sub>2</sub>-EDTA.** Comparison of representative bright-field images of platelets in PRP prepared from K<sub>2</sub>-EDTA anticoagulated blood from a healthy individual and from a patient with MYH9 p.E1841K mutation under **a.** non-stimulated (resting condition) and **b.** in the presence of platelet PAR-1 agonist TRAP-6. These event images were selected from RT-FDC scatter plots (main text Figure 7-from left to right and top to bottom- 5 images each) of corresponding experimental conditions overlaid with the contour (red outline) in ShapeOut analysis software. Arrow indicates the direction of flow and the scale bar corresponds to 10μm.



**a.** ACD-A (non-stimulated)

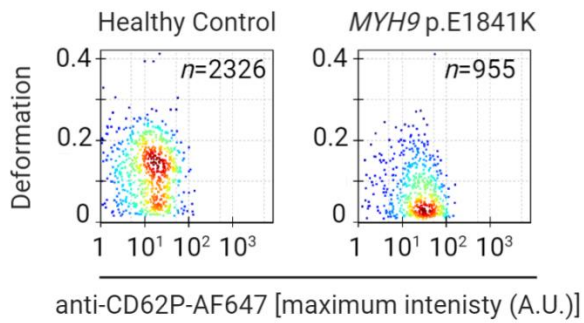

**b.** K<sub>2</sub>-EDTA (non-stimulated)

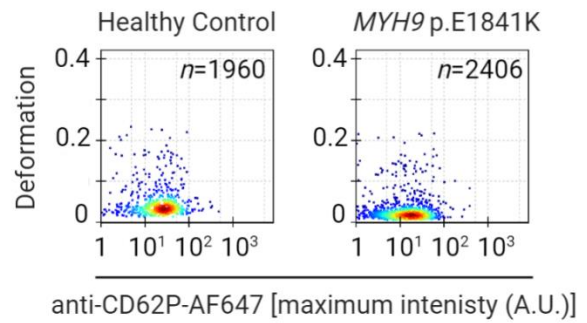

**c.** ACD-A (TRAP-6 stimulated)

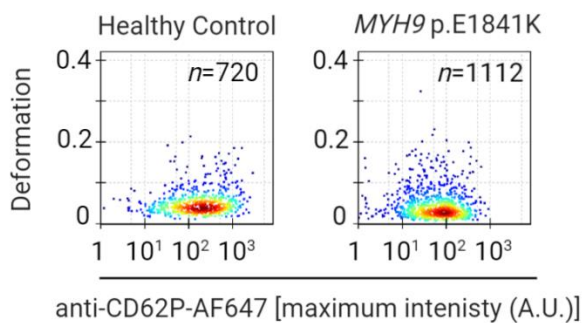

**d.** K<sub>2</sub>-EDTA (TRAP-6 stimulated)

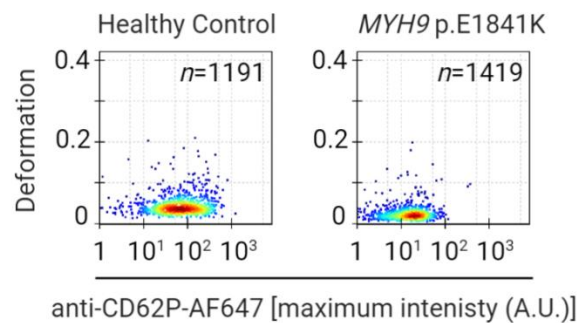

min  max  
Event Density

**Supplementary Fig.12: Platelet deformation and CD62P expression from patient with *MYH9* p.E1841K.** Comparison of scatter plots colored by Kernel Density Estimate (KDE) of RT-FDC data of deformation and CD62P expression (plotted on log<sub>10</sub> scale of maximum intensity in arbitrary units (A.U.) of anti-CD62P-AlexaFluor647) on single platelets in PRP from a healthy individual and from a patient with *MYH9* p.E1841K mutation under non-stimulated in **a.** ACD-A and **b.** K<sub>2</sub>-EDTA upon stimulation **c.** and **d.** with TRAP-6. Color coding of event density in scatter plots indicates a linear density scale from min (blue) to max (dark red).

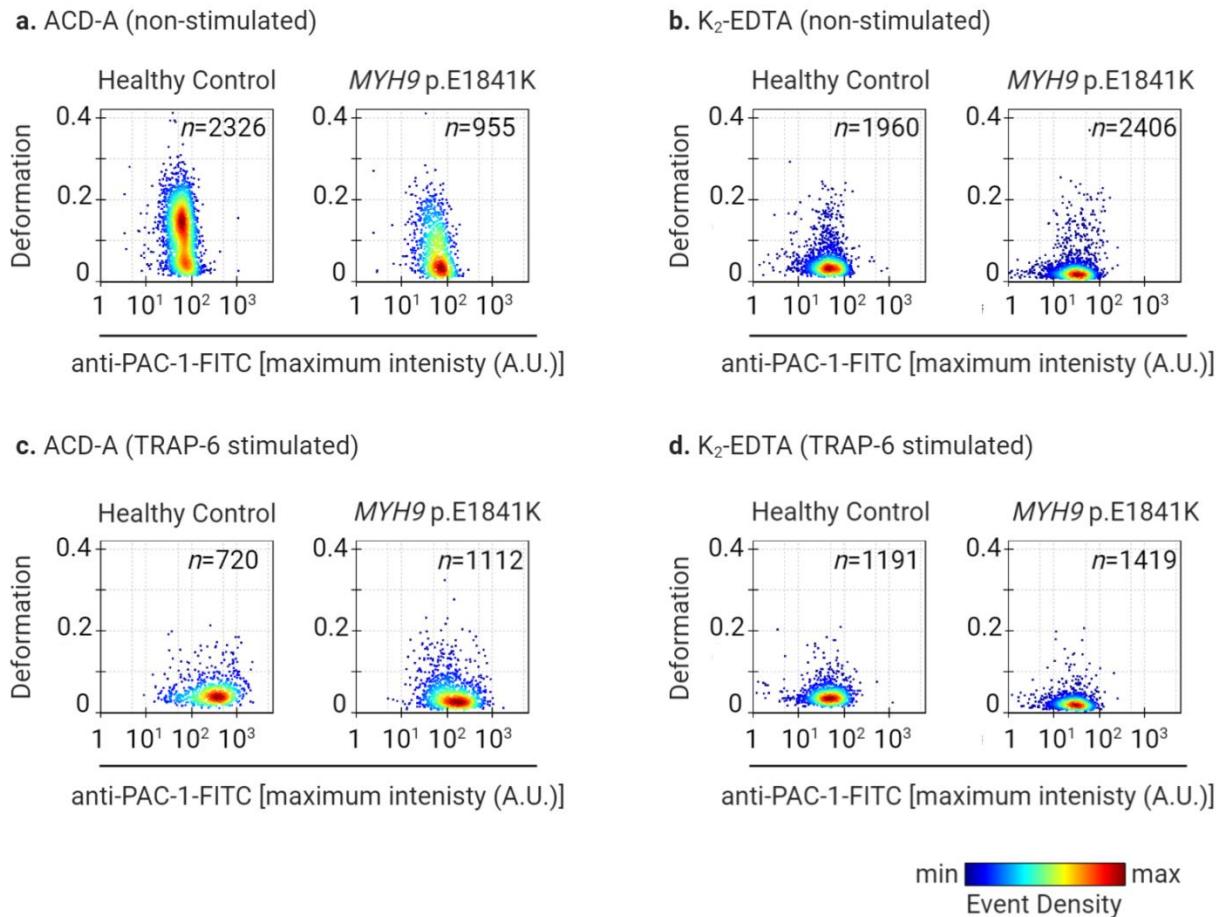

**Supplementary Fig. 13: Platelet deformation and platelet activation measured for binding of anti-PAC-1 antibody as a function of exposure of conformational epitope of the integrin  $\alpha IIb\beta 3$  from patient with *MYH9* p.E1841K.** Comparison of scatter plots colored by Kernel Density Estimate (KDE) of RT-FDC data of deformation and anti-PAC-1 binding (plotted on log10 scale of maximum intensity in arbitrary units (A.U.) of anti-PAC-1-FITC) on single platelets in PRP from a healthy individual and from a patient with *MYH9* p.E1841K mutation under non-stimulated in **a.** ACD-A and **b.** K2-EDTA upon stimulation **c.** and **d.** with TRAP-6. Color coding of event density in scatter plots indicates a linear density scale from min (blue) to max (dark red).

**a. ACD-A**

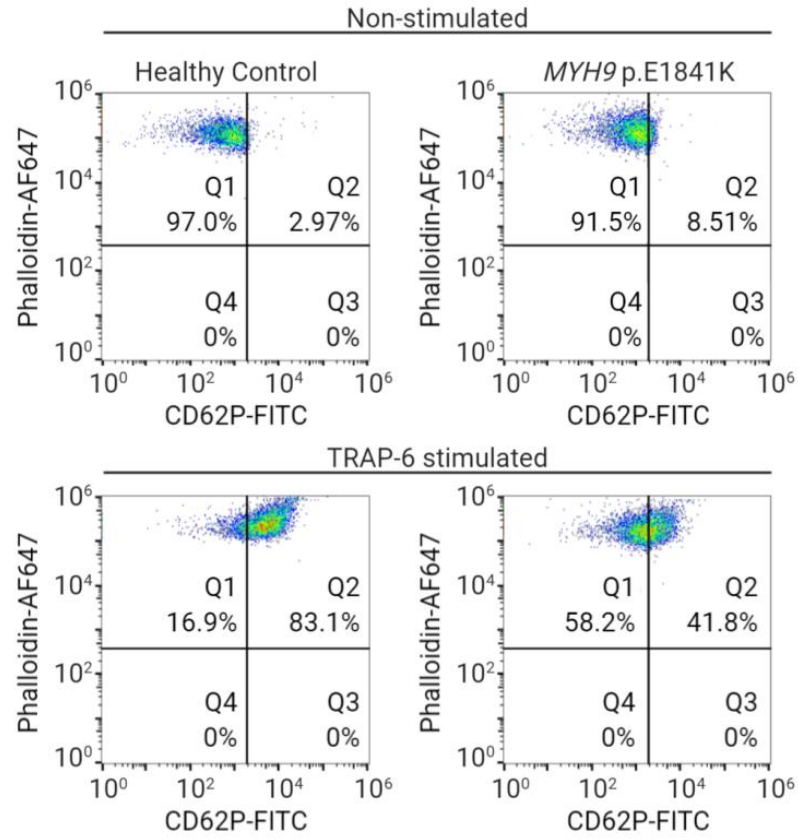

**b. K<sub>2</sub>-EDTA**

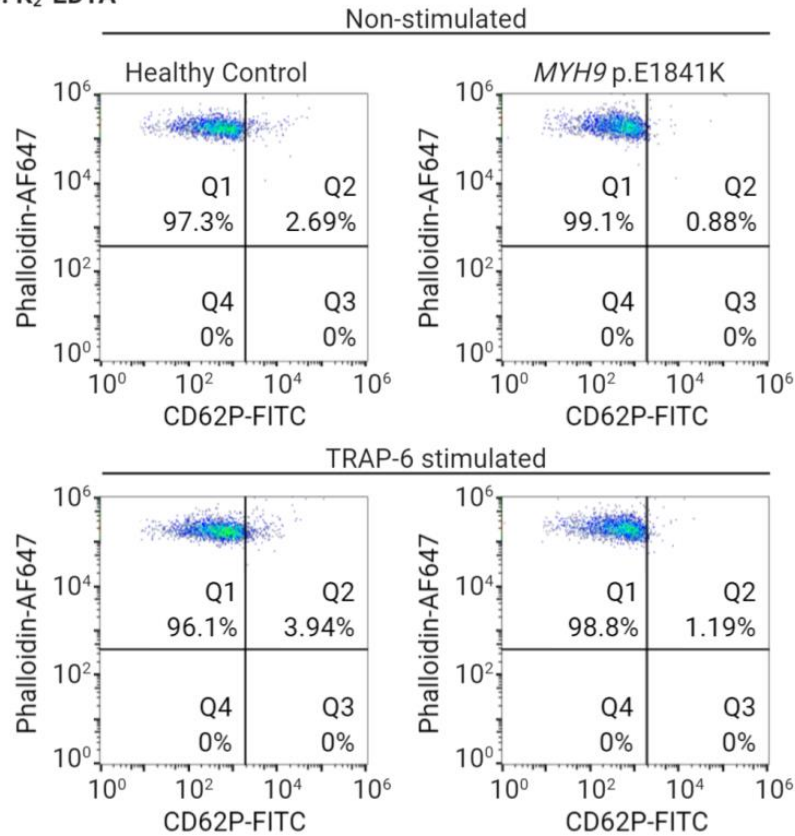

**Supplementary Fig.14: Flow cytometric detection of platelet CD62P expression and F-actin content in *MYH9* p.E1841K patient.** Flow cytometry bivariate density dot plots of non-stimulated and TRAP-6 stimulated platelets in PRP. Platelets are labeled for platelet specific activation marker CD62P (with anti-CD62P-FITC) and F-actin (with Phalloidin-AF647) in different *ex vivo* anticoagulants **a.** ACD-A and **b.** K<sub>2</sub>-EDTA. The quadrant regions show the percentage of platelets in each sub-population.
